# Supplementary material for: Thickness-dependent quasi-two-dimensional β-Ga2O3 solar-blind photodetectors prepared via GaSe oxidation
Source: Royal Society of Chemistry journal article supplement (doi:10.1039/d4tc04826a), 2024-11-29
Supplement: d4tc04826a1.pdf [file d4tc04826a1.pdf]

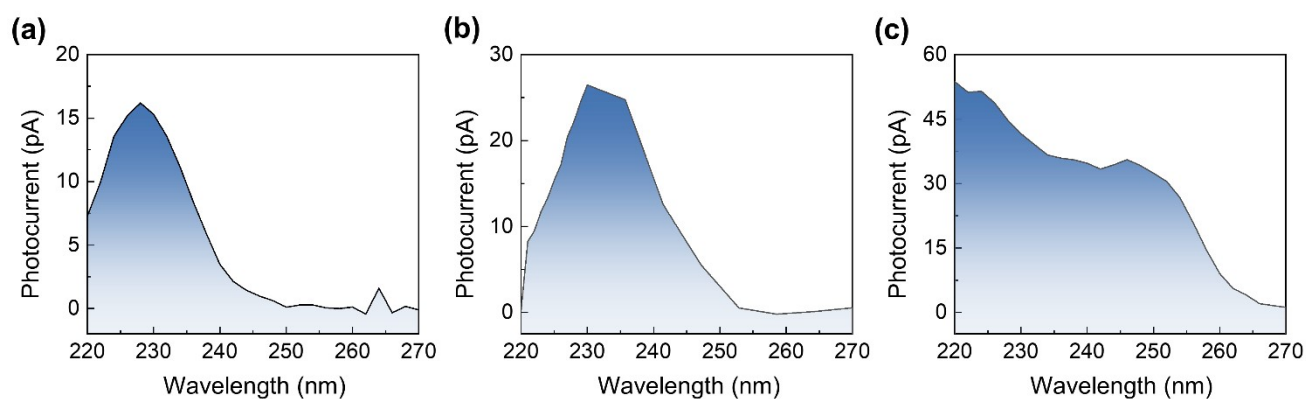

Fig. S1 Photocurrent versus incident wavelength curves for devices of different thicknesses at the same light intensity. (a) 13 nm Ga<sub>2</sub>O<sub>3</sub>-based device. (b) 75 nm Ga<sub>2</sub>O<sub>3</sub>-based device. (c) 160 nm Ga<sub>2</sub>O<sub>3</sub>-based device.

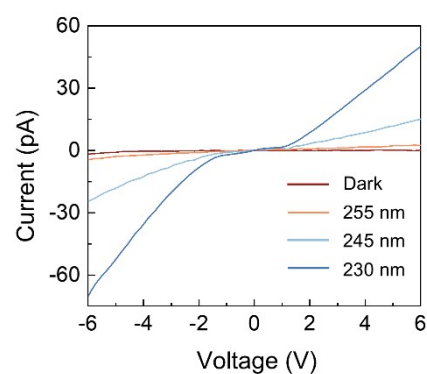

Fig. S2 I-V curves of 13 nm thick Ga<sub>2</sub>O<sub>3</sub> under illumination at different wavelengths.
